# Supplementary material for: Structural and optical characterization of 3D binary colloidal crystal and inverse opal films prepared by direct co-deposition
Source: Royal Society of Chemistry journal article supplement (doi:10.1039/b715329e), 2008-01-01
Supplement: b715329e.pdf [file b715329e.pdf]

Supplemental Information

Structural and Optical Characterization of 3D Binary Colloidal Crystal and Inverse Opal  
Films Prepared by Direct Codeposition

Jianjun Wang<sup>1\*</sup>), Stefanie Ahl,<sup>1)</sup> Qin Li<sup>1)</sup>, Maximilian Kreiter<sup>1)</sup>, Thomas Neumann<sup>2)</sup>, Klaus Burkert<sup>2)</sup>, Wolfgang Knoll<sup>1)</sup> and Ulrich Jonas<sup>1,3\*)</sup>

- 1) Max Planck Institute for Polymer Research, Ackermannweg 10, 55128 Mainz, Germany; contact: Tel.: +49 6131 379 163, Fax: +49 6131 379 100, [wangj@mpip-mainz.mpg.de](mailto:wangj@mpip-mainz.mpg.de), [jonas@mpip-mainz.mpg.de](mailto:jonas@mpip-mainz.mpg.de)
- 2) Graffinity Pharmaceuticals GmbH, Im Neuenheimer Feld 518-519, 69120 Heidelberg, Germany
- 3) FORTH/IESL, Voutes Str. P. O. Box 1527, 71110 Heraklion, Crete, Greece

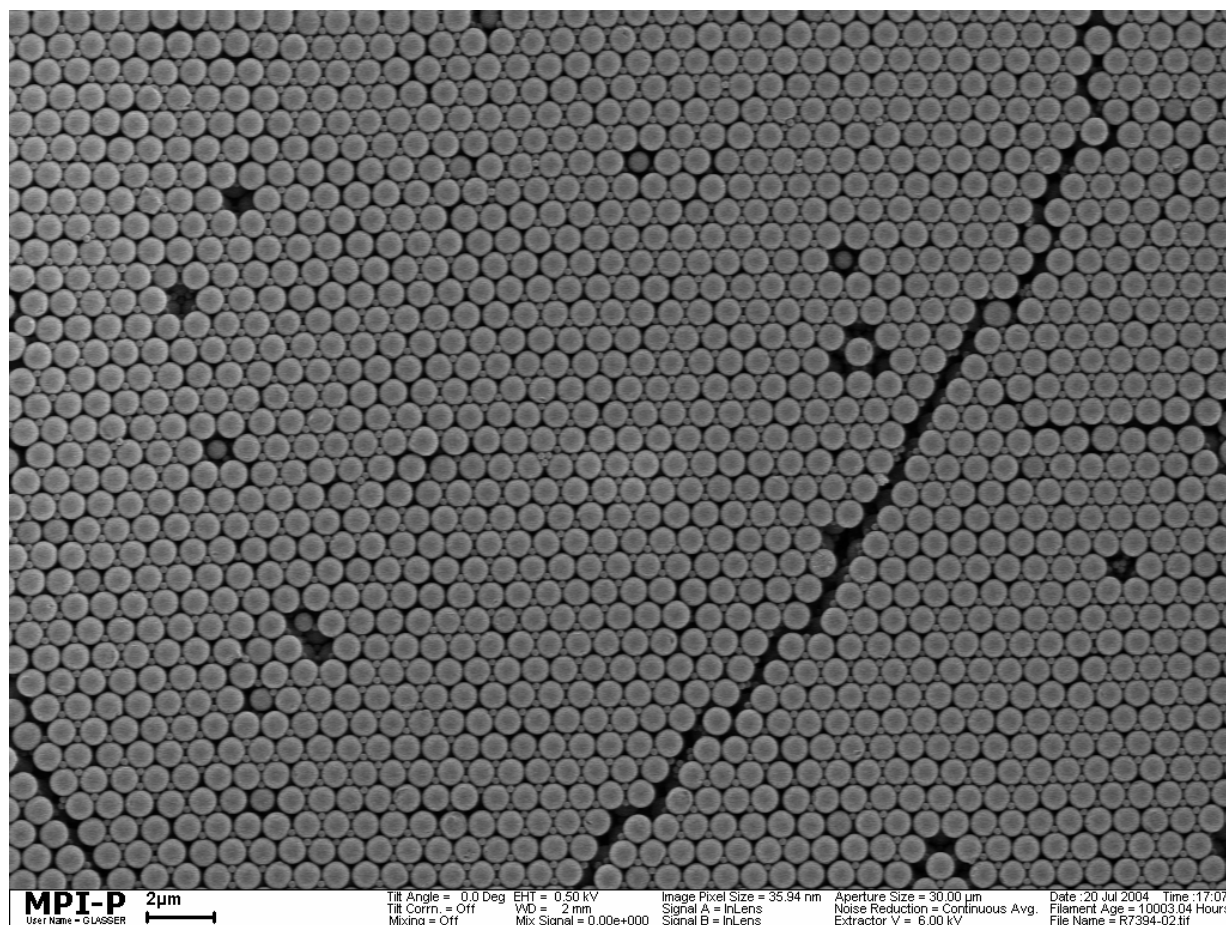

Figure S1: Low magnification SEM image of a PS/PS binary colloidal crystal ( $d_L = 839$  nm,  $\phi_L = 0.01$ ,  $d_S = 187$  nm,  $\phi_S = 2.0 \times 10^{-4}$ ) with  $\gamma_{S/L} = 0.223$ ,  $N_S/N_L = 1.80$ .

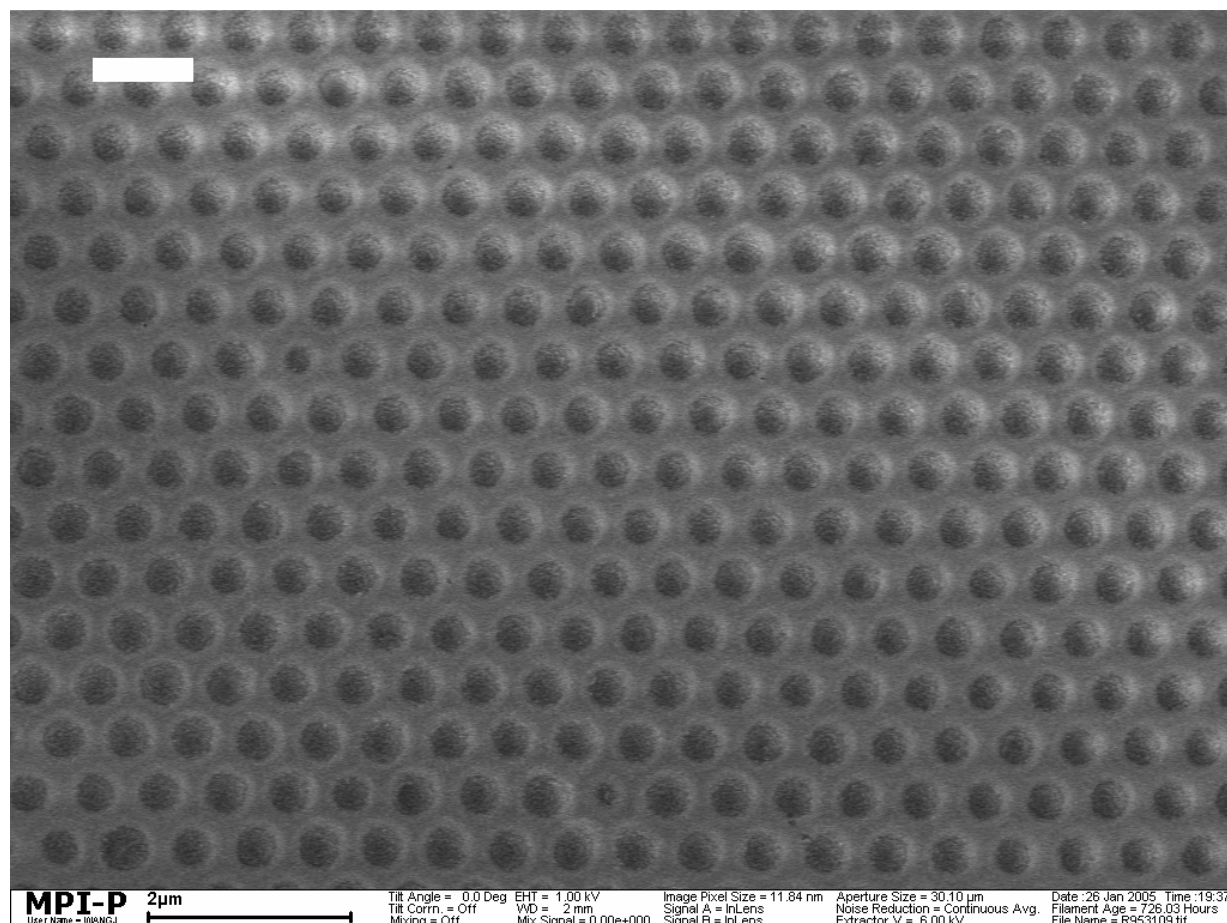

Figure S2: SEM images of silica/polystyrene composite film,  $d_{\text{silica}} = 10 \text{ nm}$ ,  $\phi_{\text{silica}} = 8.62 \times 10^{-4}$ ,  $d_L = 626 \text{ nm}$ ,  $\phi_L = 0.012$ .

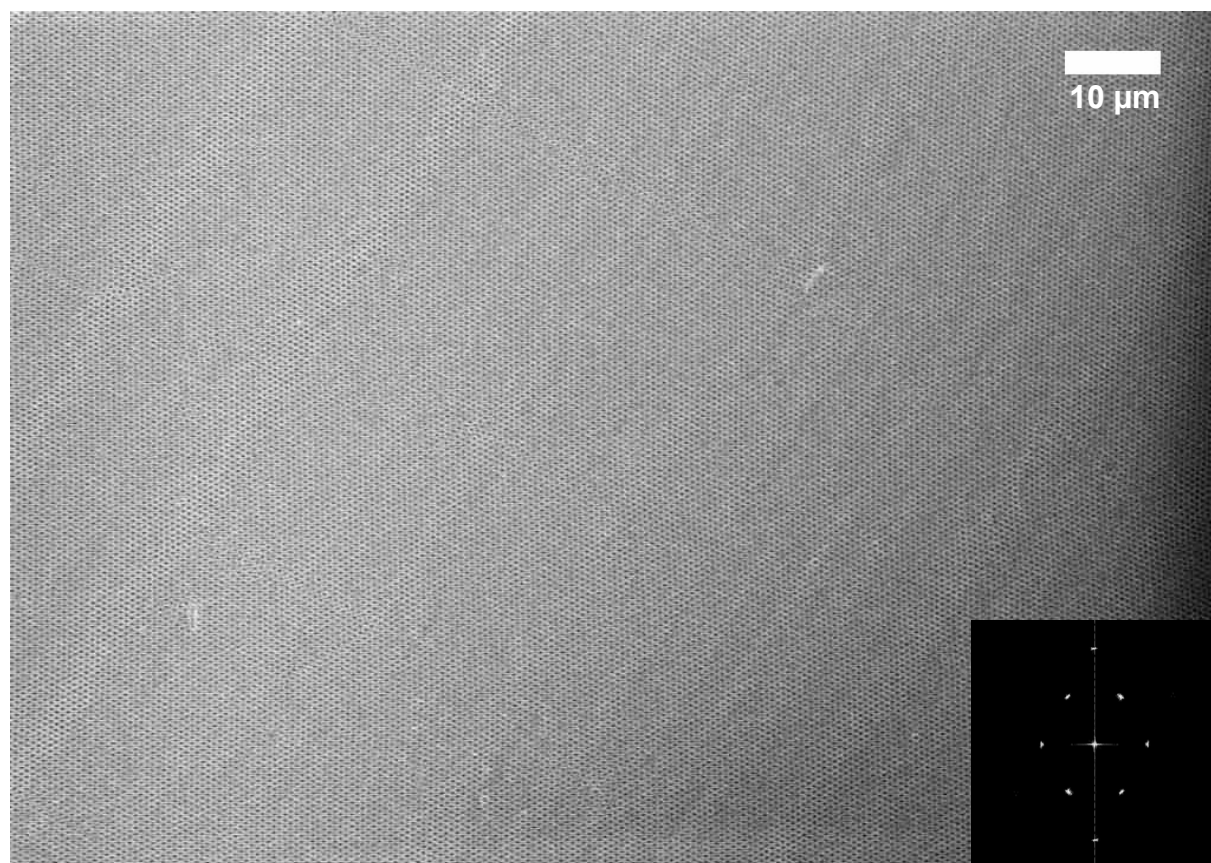

Figure S3: Low magnification image of a silica inverse opal together with FFT inset showing the quality of prepared silica inverse opal. Template PS latex with diameter of 626 nm, diameter of silica nanoparticles is 10 nm. Pyrolysis of silica/PS composite film was carried at 450°C in air.

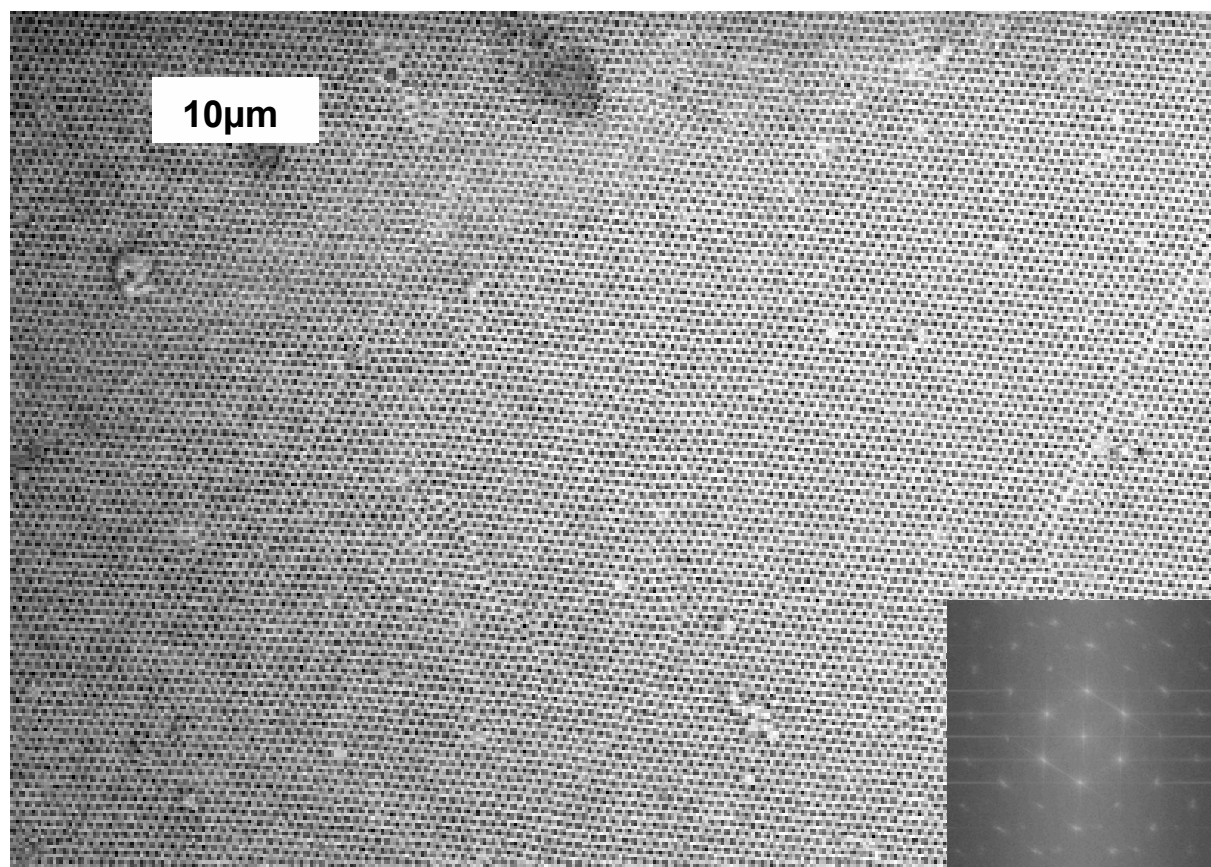

Figure S4: Low magnification image of silica/gold hybrid inverse opals, FFT inset of the image shows high quality of the composite inverse opals.
